# Supplementary material for: Evolutionary gain and loss of a plant pattern-recognition receptor for HAMP recognition
Source: eLife journal article supplement (doi:10.7554/elife.81050), 2022-10-28
Supplement: supp [file elife_poa_e81050_Figure_2_figure_supplement_2.pdf › elife_poa_e81050_Figure_2_figure_supplement_2.pdf]

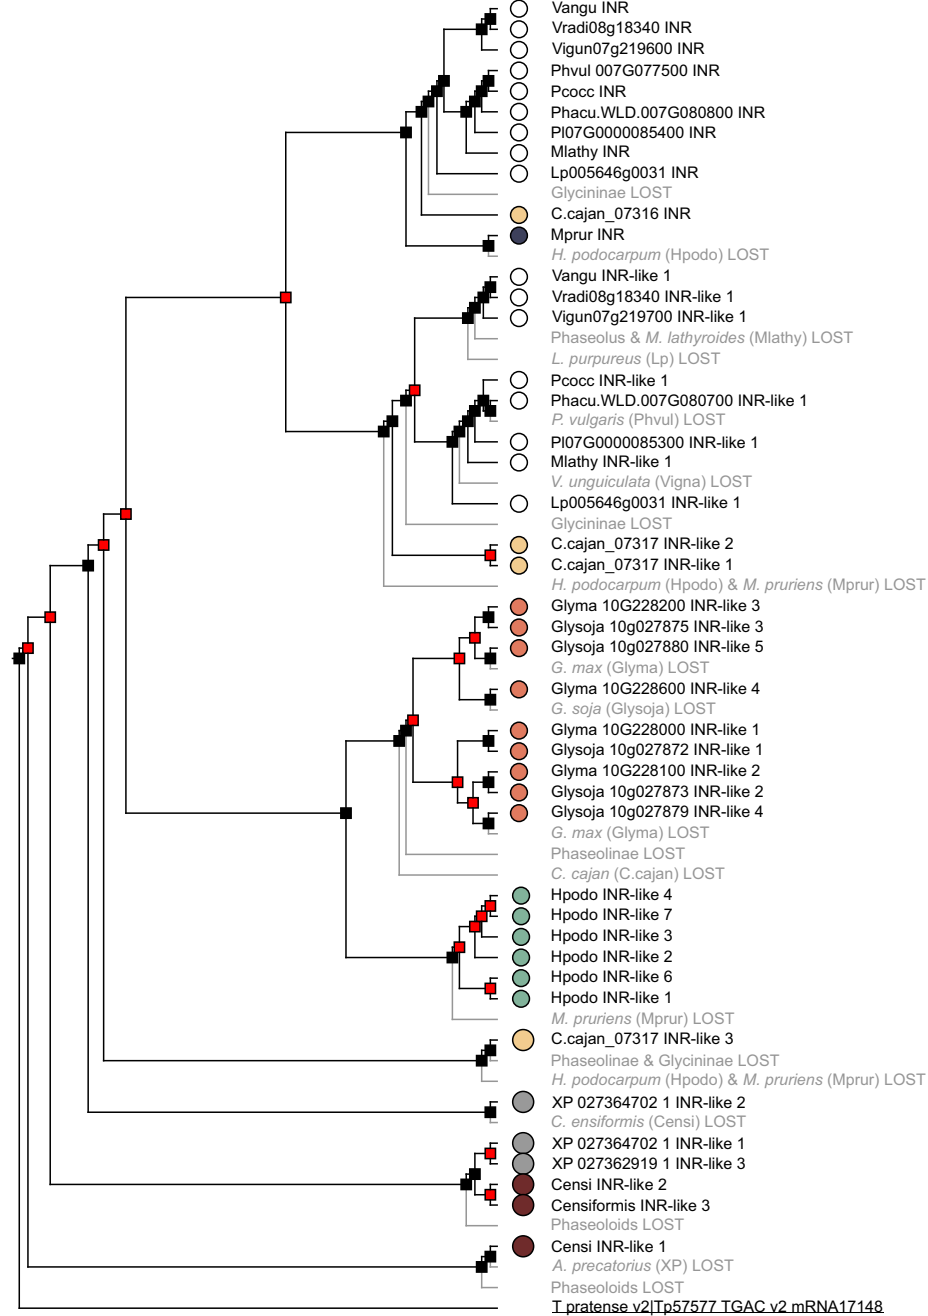

## Legend

■ Duplication event

### Phaseolines

○ *V. angularis* - Vangu  
*V. radiata* - Vradi  
*V. unguiculata* - Vigun  
*P. vulgaris* - Phvul  
*P. coccineus* - Pcocc  
*P. acutifolius* - Phacu  
*P. lunatus* - Pl  
*M. lathyroides* - Mlathy  
*L. purpureus* - Lp

### Glycininae

○ *G. max* - Glyma  
*G. soja* - Glysoja

### Cajaninae

○ *C. cajan* - C.cajan

### Desmodieae

○ *H. podocarpum* - Hpodo

### Mucuna

○ *M. pruriens* - Mprur

### Diocleae

○ *C. ensiformis* - Censi

### Arbreae

○ *A. precatorius* - XP
