# Supplementary material for: Evolutionary gain and loss of a plant pattern-recognition receptor for HAMP recognition
Source: eLife. 2022 Nov 15;11:e81050. doi: 10.7554/eLife.81050 (PMC9718524; doi:10.7554/eLife.81050)
Supplement: Supplementary file 5. [file elife-81050-supp5.xlsx]

## Sheet: Supplementary file 5a
Supplementary file 5a: Overview of the used legume species, accessions, and their origin
Scientific name	Common name	Accession	Origin
Cajanus cajan	pigeon pea	UCR-1	Phil Roberts, UC Riverside, CA
Calopogonium mucunoides	calopo	PI 318466 01 SD	US Department of Agriculture (USDA) Germplasm resources Information network (GRIN)
Canavalia ensiformis	jack bean	PI 364355 01 SD	US Department of Agriculture (USDA) Germplasm resources Information network (GRIN)
Centrosema molle	butterfly pea	PI 212980 01 SD	US Department of Agriculture (USDA) Germplasm resources Information network (GRIN)
Clitoria ternatea	blue pea	PI 258379 04 SD	US Department of Agriculture (USDA) Germplasm resources Information network (GRIN)
Cologonia angustifolia	longleaf cologonia	99-0130	US Department of Agriculture (USDA) Germplasm resources Information network (GRIN)
Cyamopsis tetragonoloba	guar bean	PI 688679 01 SD	US Department of Agriculture (USDA) Germplasm resources Information network (GRIN)
Desmodium unicatum	silverleaf desmodium	PI 212226 01 SD	US Department of Agriculture (USDA) Germplasm resources Information network (GRIN)
Glycine max	soybean	Williams 82	US Department of Agriculture (USDA) Germplasm resources Information network (GRIN)
Hylodesmum podocarpum	/	PI 286475 02 SD	US Department of Agriculture (USDA) Germplasm resources Information network (GRIN)
Lablab purpureus	hyacinth bean	PI 164772 01 SD	US Department of Agriculture (USDA) Germplasm resources Information network (GRIN)
Macroptilium atropurpureum	purlple bush bean	PI 304148 01 SD	US Department of Agriculture (USDA) Germplasm resources Information network (GRIN)
Macroptilium lathyroides	phasey bean	PI 276184 01 SD	US Department of Agriculture (USDA) Germplasm resources Information network (GRIN)
Mucuna pruriens	velvet bean	PI 364362 03 SD	US Department of Agriculture (USDA) Germplasm resources Information network (GRIN)
Pachyrhizus erosus	yam bean	PI 574551 01 SD	US Department of Agriculture (USDA) Germplasm resources Information network (GRIN)
Phaseolus vulgaris	common bean	G19833	Phil Miklas, US Department of Agriculture (USDA, Prosser, WA)
Psophocarpus tetrangonolobus	winged bean	PI 477192 01 SD	US Department of Agriculture (USDA) Germplasm resources Information network (GRIN)
Rhynchosia minima	least snout-bean	PI 325587 01 SD	US Department of Agriculture (USDA) Germplasm resources Information network (GRIN)
Tephrosia vogelii	fish-poison bean	PI 305346 01 SD	US Department of Agriculture (USDA) Germplasm resources Information network (GRIN)
Teramnus labialis	blue wiss	PI 660727 01 SD	US Department of Agriculture (USDA) Germplasm resources Information network (GRIN)
Vigna radiata	mung bean	VC1973A	Creighton Miller, Texas A&M University, College Station, TX
Vigna unguiculata	cowpea	IT97K-499-35	Timothy Close, UC Riverside, CA

## Sheet: Supplementary file 5b
Supplementary file 5b: Overview of ethylene response data of legume species and the details of the experimental set-up
Treatment	Plant	Replicate	Ethylene	Ratio
H2O	P. vulgaris G19833	1	21.8	1
In11	P. vulgaris G19833	1	34.8	1.59633
flg22	P. vulgaris G19833	1	27.3	1.25229
H2O	P. vulgaris G19833	2	24.3	1
In11	P. vulgaris G19833	2	37.2	1.53086
flg22	P. vulgaris G19833	2	20.3	0.835391
H2O	P. erosus	1	15.2	1
In11	P. erosus	1	17.6	1.15789
flg22	P. erosus	1	18.2	1.19737
H2O	M. artropurpureum	1	23.9	1
In11	M. artropurpureum	1	109.7	4.58996
flg22	M. artropurpureum	1	32.3	1.35146
H2O	M. artropurpureum	2	20.4	1
In11	M. artropurpureum	2	63.9	3.13235
flg22	M. artropurpureum	2	72	3.52941
H2O	M. lathyroides	1	37.5679	1
In11	M. lathyroides	1	90.9431	2.42077
flg22	M. lathyroides	1	79.1766	2.10756
H2O	M. lathyroides	2	30.9717	1
In11	M. lathyroides	2	68.5011	2.21174
flg22	M. lathyroides	2	24.9274	0.804845
H2O	M. lathyroides	3	83.3538	1
In11	M. lathyroides	3	103.368	1.24011
flg22	M. lathyroides	3	84.768	1.01697
H2O	M. lathyroides	4	69.7379	1
In11	M. lathyroides	4	118.378	1.69748
flg22	M. lathyroides	4	79.9887	1.14699
H2O	M. lathyroides	5	80.5392	1
In11	M. lathyroides	5	107.538	1.33522
flg22	M. lathyroides	5	88.5253	1.09916
H2O	P. vulgaris G19833	3	18.9063	1
In11	P. vulgaris G19833	3	38.9161	2.05836
flg22	P. vulgaris G19833	3	15.4514	0.817261
H2O	P. vulgaris G19833	4	16.3117	1
In11	P. vulgaris G19833	4	40.3578	2.47417
flg22	P. vulgaris G19833	4	20.3282	1.24624
H2O	P. vulgaris G19833	5	18.7878	1
In11	P. vulgaris G19833	5	33.1137	1.76252
flg22	P. vulgaris G19833	5	21.5967	1.14951
H2O	P. vulgaris G19833	6	16.6106	1
In11	P. vulgaris G19833	6	47.0841	2.83458
flg22	P. vulgaris G19833	6	24.7985	1.49293
H2O	P. vulgaris G19833	7	23.1156	1
In11	P. vulgaris G19833	7	34.9778	1.51317
flg22	P. vulgaris G19833	7	16.5628	0.716521
H2O	P. vulgaris G19833	8	18.6819	1
In11	P. vulgaris G19833	8	56.4852	3.02353
flg22	P. vulgaris G19833	8	31.0595	1.66255
H2O	P. vulgaris G19833	9	29.4412	1
In11	P. vulgaris G19833	9	37.6346	1.2783
flg22	P. vulgaris G19833	9	23.0534	0.783034
H2O	P. vulgaris G19833	10	14.0392	1
In11	P. vulgaris G19833	10	37.496	2.67081
flg22	P. vulgaris G19833	10	23.6768	1.68649
H2O	P. vulgaris G19833	11	16.647	1
In11	P. vulgaris G19833	11	32.2091	1.93483
flg22	P. vulgaris G19833	11	24.7646	1.48763
H2O	P. vulgaris G19833	12	16.4693	1
In11	P. vulgaris G19833	12	42.1348	2.55838
flg22	P. vulgaris G19833	12	20.532	1.24668
H2O	M. artropurpureum	3	35.7514	1
In11	M. artropurpureum	3	82.114	2.2968
flg22	M. artropurpureum	3	34.1087	0.954052
H2O	C. ensiformis	1	7.97737	1
In11	C. ensiformis	1	5.08759	0.637752
flg22	C. ensiformis	1	7.81721	0.979923
H2O	C. ensiformis	2	3.81202	1
In11	C. ensiformis	2	2.04085	0.535371
flg22	C. ensiformis	2	3.07316	0.806176
H2O	C. ensiformis	3	3.04307	1
In11	C. ensiformis	3	1.87805	0.617157
flg22	C. ensiformis	3	2.79221	0.917561
H2O	C. ensiformis	4	3.92447	1
In11	C. ensiformis	4	3.30099	0.84113
flg22	C. ensiformis	4	3.26328	0.831519
H2O	C. ensiformis	5	6.87772	1
In11	C. ensiformis	5	6.97849	1.01465
flg22	C. ensiformis	5	7.59178	1.10382
H2O	C. cajan UCR1	1	7.64441	1
In11	C. cajan UCR1	1	13.7451	1.79805
flg22	C. cajan UCR1	1	9.80112	1.28213
H2O	C. cajan UCR1	2	13.9938	1
In11	C. cajan UCR1	2	21.4727	1.53444
flg22	C. cajan UCR1	2	15.7583	1.12609
H2O	C. cajan UCR1	3	30.0339	1
In11	C. cajan UCR1	3	39.7342	1.32298
flg22	C. cajan UCR1	3	23.8528	0.794195
H2O	T. labialis	1	14.5569	1
In11	T. labialis	1	20.2345	1.39003
flg22	T. labialis	1	33.7284	2.31701
H2O	T. labialis	2	11.1682	1
In11	T. labialis	2	24.5764	2.20057
flg22	T. labialis	2	16.9843	1.52077
H2O	T. labialis	3	9.60008	1
In11	T. labialis	3	12.6427	1.31694
flg22	T. labialis	3	15.8754	1.65367
H2O	T. labialis	4	3.89917	1
In11	T. labialis	4	14.4024	3.69372
flg22	T. labialis	4	24.898	6.38548
H2O	T. labialis	5	6.52476	1
In11	T. labialis	5	12.3013	1.88532
flg22	T. labialis	5	18.9753	2.9082
H2O	R. minima	1	16.7873	1
In11	R. minima	1	48.2262	2.87279
flg22	R. minima	1	29.4645	1.75517
H2O	R. minima	2	11.1724	1
In11	R. minima	2	40.181	3.59646
flg22	R. minima	2	37.5769	3.36338
H2O	R. minima	3	14.8342	1
In11	R. minima	3	74.6079	5.02946
flg22	R. minima	3	42.9743	2.89698
H2O	C. mucunoides	1	8.17115	1
In11	C. mucunoides	1	2.56428	0.313822
flg22	C. mucunoides	1	6.69068	0.818818
H2O	M. pruriens	1	5.80793	1
In11	M. pruriens	1	28.4516	4.89875
flg22	M. pruriens	1	5.22211	0.899135
H2O	C. ternatea	1	10.0886	1
In11	C. ternatea	1	8.81321	0.873582
flg22	C. ternatea	1	9.33304	0.925108
H2O	D. unicatum	1	2.54907	1
In11	D. unicatum	1	4.44723	1.74464
flg22	D. unicatum	1	6.30465	2.47331
H2O	D. unicatum	2	3.61865	1
In11	D. unicatum	2	6.77771	1.87299
flg22	D. unicatum	2	8.45742	2.33717
H2O	C. cajan UCR1	4	16.6485	1
In11	C. cajan UCR1	4	14.8038	0.889198
flg22	C. cajan UCR1	4	18.7411	1.12569
H2O	C. cajan UCR1	5	13.9032	1
In11	C. cajan UCR1	5	32.0483	2.3051
flg22	C. cajan UCR1	5	28.9695	2.08365
H2O	C. molle	1	34.3253	1
In11	C. molle	1	33.9646	0.989491
flg22	C. molle	1	132.981	3.87415
H2O	M. pruriens	2	7.88778	1
In11	M. pruriens	2	22.0593	2.79664
flg22	M. pruriens	2	8.14977	1.03322
H2O	M. pruriens	3	6.67308	1
In11	M. pruriens	3	21.1183	3.1647
flg22	M. pruriens	3	9.41362	1.41069
H2O	M. pruriens	4	3.96646	1
In11	M. pruriens	4	10.7334	2.70604
flg22	M. pruriens	4	4.74805	1.19705
H2O	C. ternatea	2	20.4535	1
In11	C. ternatea	2	18.8583	0.922007
flg22	C. ternatea	2	26.6267	1.30181
H2O	C. ternatea	3	14.302	1
In11	C. ternatea	3	14.1171	0.987071
flg22	C. ternatea	3	19.7572	1.38142
H2O	G. max Williams	1	7.32954	1
In11	G. max Williams	1	8.89288	1.21329
flg22	G. max Williams	1	4.42604	0.603863
H2O	C. cajan UCR1	6	25.6565	1
In11	C. cajan UCR1	6	33.2526	1.29607
flg22	C. cajan UCR1	6	23.3831	0.911393
H2O	C. cajan UCR1	7	20.9077	1
In11	C. cajan UCR1	7	43.7307	2.09161
flg22	C. cajan UCR1	7	22.7071	1.08606
H2O	C. cajan UCR1	8	30.671	1
In11	C. cajan UCR1	8	87.3907	2.8493
flg22	C. cajan UCR1	8	38.7341	1.26289
H2O	C. molle	2	7.62494	1
In11	C. molle	2	4.96657	0.651358
flg22	C. molle	2	4.5606	0.598116
H2O	C. molle	3	7.00865	1
In11	C. molle	3	4.56441	0.651254
flg22	C. molle	3	12.4132	1.77112
H2O	C. mucunoides	2	2.30803	1
In11	C. mucunoides	2	2.25028	0.974981
flg22	C. mucunoides	2	2.55706	1.1079
H2O	P. erosus	2	11.3354	1
In11	P. erosus	2	14.4865	1.27799
flg22	P. erosus	2	10.3526	0.913298
H2O	P. erosus	3	14.6565	1
In11	P. erosus	3	14.6518	0.999683
flg22	P. erosus	3	11.0893	0.756612
H2O	P. erosus	4	10.3926	1
In11	P. erosus	4	10.4791	1.00831
flg22	P. erosus	4	11.5778	1.11404
H2O	P. erosus	5	10.0176	1
In11	P. erosus	5	9.03222	0.901634
flg22	P. erosus	5	11.5507	1.15304
H2O	P. erosus	6	14.0803	1
In11	P. erosus	6	14.8	1.05111
flg22	P. erosus	6	16.9807	1.20599
H2O	T. vogelii	1	15.9582	1
In11	T. vogelii	1	13.7412	0.861072
flg22	T. vogelii	1	14.8352	0.929629
H2O	M. pruriens	5	3.16941	1
In11	M. pruriens	5	7.83501	2.47207
flg22	M. pruriens	5	4.81934	1.52058
H2O	P. erosus	7	6.46012	1
In11	P. erosus	7	6.22625	0.963798
flg22	P. erosus	7	7.14564	1.10612
H2O	M. pruriens	6	11.8836	1
In11	M. pruriens	6	20.0088	1.68373
flg22	M. pruriens	6	17.6615	1.48621
H2O	M. pruriens	7	3.93601	1
In11	M. pruriens	7	18.8916	4.79969
flg22	M. pruriens	7	11.9055	3.02476
H2O	V. radiata	1	9.76961	1
In11	V. radiata	1	24.9934	2.55828
flg22	V. radiata	1	8.80015	0.900768
H2O	V. radiata	2	12.8363	1
In11	V. radiata	2	20.2501	1.57757
flg22	V. radiata	2	17.9334	1.39709
H2O	V. radiata	3	4.602	1
In11	V. radiata	3	8.0094	1.74042
flg22	V. radiata	3	6.2855	1.36582
H2O	V. radiata	4	11.6828	1
In11	V. radiata	4	19.6723	1.68386
flg22	V. radiata	4	13.9129	1.19088
H2O	V. radiata	5	18.8088	1
In11	V. radiata	5	30.0614	1.59827
flg22	V. radiata	5	11.7096	0.622559
H2O	V. radiata	6	5.62464	1
In11	V. radiata	6	11.0448	1.96364
flg22	V. radiata	6	7.73109	1.3745
H2O	D. unicatum	3	5.90861	1
In11	D. unicatum	3	5.10772	0.864454
flg22	D. unicatum	3	4.2195	0.714127
H2O	D. unicatum	4	3.60672	1
In11	D. unicatum	4	3.96378	1.099
flg22	D. unicatum	4	5.70457	1.58165
H2O	D. unicatum	5	2.4673	1
In11	D. unicatum	5	4.80652	1.94809
flg22	D. unicatum	5	4.6668	1.89146
H2O	D. unicatum	6	2.24436	1
In11	D. unicatum	6	4.10599	1.82947
flg22	D. unicatum	6	5.00107	2.22828
H2O	D. unicatum	7	2	1
In11	D. unicatum	7	5.77611	2.88805
flg22	D. unicatum	7	7.4721	3.73605
H2O	P. tetragonolobus	1	10.8363	1
In11	P. tetragonolobus	1	12.2786	1.1331
flg22	P. tetragonolobus	1	16.5667	1.52882
H2O	P. tetragonolobus	2	9.40471	1
In11	P. tetragonolobus	2	13.39	1.42375
flg22	P. tetragonolobus	2	13.6138	1.44755
H2O	R. minima	4	13.4126	1
In11	R. minima	4	29.4484	2.19558
flg22	R. minima	4	15.2602	1.13776
H2O	R. minima	5	14.1405	1
In11	R. minima	5	31.0508	2.19588
flg22	R. minima	5	17.6004	1.24468
H2O	P. vulgaris G19833	13	28.5922	1
In11	P. vulgaris G19833	13	66.3978	2.32223
flg22	P. vulgaris G19833	13	26.5889	0.929933
H2O	T. vogelii	2	5.07848	1
In11	T. vogelii	2	5.26856	1.03743
flg22	T. vogelii	2	5.48502	1.08005
H2O	V. radiata	7	5.20414	1
In11	V. radiata	7	8.6254	1.65741
flg22	V. radiata	7	6.87642	1.32134
H2O	C. ternatea	4	3.13438	1
In11	C. ternatea	4	2.7861	0.888886
flg22	C. ternatea	4	4.5243	1.44344
H2O	C. ensiformis	6	2.77674	1
In11	C. ensiformis	6	2.73206	0.983911
flg22	C. ensiformis	6	4.56232	1.64305
H2O	H. podocarpum	1	7.92072	1
In11	H. podocarpum	1	4.72666	0.596746
flg22	H. podocarpum	1	21.5842	2.72503
H2O	H. podocarpum	2	13.4711	1
In11	H. podocarpum	2	21.8529	1.6222
flg22	H. podocarpum	2	47.2954	3.51086
H2O	H. podocarpum	3	24.3768	1
In11	H. podocarpum	3	32.6448	1.33918
flg22	H. podocarpum	3	68.9182	2.82721
H2O	H. podocarpum	4	7.52213	1
In11	H. podocarpum	4	15.8909	2.11255
flg22	H. podocarpum	4	52.6146	6.99464
H2O	C. tetragonoloba	1	48.1399	1
In11	C. tetragonoloba	1	50.4307	1.04759
flg22	C. tetragonoloba	1	48.244	1.00216
H2O	C. tetragonoloba	2	46.2381	1
In11	C. tetragonoloba	2	43.4687	0.940104
flg22	C. tetragonoloba	2	39.5417	0.855175
H2O	C. tetragonoloba	3	72.0979	1
In11	C. tetragonoloba	3	74.98	1.03997
flg22	C. tetragonoloba	3	71.4884	0.991546
H2O	C. tetragonoloba	4	62.577	1
In11	C. tetragonoloba	4	68.6124	1.09645
flg22	C. tetragonoloba	4	64.232	1.02645
H2O	C. tetragonoloba	5	53.3182	1
In11	C. tetragonoloba	5	59.3828	1.11374
flg22	C. tetragonoloba	5	61.6251	1.1558
H2O	C. tetragonoloba	6	78.091	1
In11	C. tetragonoloba	6	85.5899	1.09603
flg22	C. tetragonoloba	6	80.9613	1.03676
H2O	C. molle	4	7.92056	1
In11	C. molle	4	8.81687	1.11316
flg22	C. molle	4	13.4662	1.70016
H2O	H. podocarpum	5	4.15051	1
In11	H. podocarpum	5	1.43977	0.346891
flg22	H. podocarpum	5	20.6314	4.97082
H2O	L. purpureus	1	38.194	1
In11	L. purpureus	1	98.9034	2.5895
flg22	L. purpureus	1	59.0999	1.54736
H2O	L. purpureus	2	48.9738	1
In11	L. purpureus	2	153.89	3.14229
flg22	L. purpureus	2	60.0935	1.22705
H2O	L. purpureus	3	35.6785	1
In11	L. purpureus	3	108.364	3.03725
flg22	L. purpureus	3	51.245	1.4363
H2O	L. purpureus	4	32.3103	1
In11	L. purpureus	4	42.7338	1.3226
flg22	L. purpureus	4	43.7019	1.35257
H2O	C. ensiformis	7	66.3998	1
In11	C. ensiformis	7	65.8736	0.992075
flg22	C. ensiformis	7	77.1375	1.16171
H2O	C. ensiformis	8	54.0236	1
In11	C. ensiformis	8	44.2019	0.818197
flg22	C. ensiformis	8	73.2911	1.35665
H2O	C. ensiformis	9	22.2699	1
In11	C. ensiformis	9	25.0928	1.12676
flg22	C. ensiformis	9	24.2462	1.08874
H2O	C. ensiformis	10	102.855	1
In11	C. ensiformis	10	91.388	0.888514
flg22	C. ensiformis	10	119.344	1.16031
H2O	R. minima	6	31.0043	1
In11	R. minima	6	58.6149	1.89054
flg22	R. minima	6	47.1969	1.52227
H2O	G. max Williams	2	11.1414	1
In11	G. max Williams	2	9.7587	0.875892
flg22	G. max Williams	2	63.0137	5.6558
H2O	P. tetragonolobus	3	7.17598	1
In11	P. tetragonolobus	3	4.26613	0.594502
flg22	P. tetragonolobus	3	12.0083	1.6734
H2O	P. tetragonolobus	4	12.6913	1
In11	P. tetragonolobus	4	10.7886	0.850077
flg22	P. tetragonolobus	4	19.7331	1.55485
H2O	V. unguiculata IT97	1	31.4913	1
In11	V. unguiculata IT97	1	520.832	16.5389
flg22	V. unguiculata IT97	1	24.5204	0.77864
H2O	V. unguiculata IT97	2	55.4684	1
In11	V. unguiculata IT97	2	622.068	11.2148
flg22	V. unguiculata IT97	2	93.9587	1.69391
H2O	C. tetragonoloba	7	104.927	1
In11	C. tetragonoloba	7	127.319	1.21341
flg22	C. tetragonoloba	7	124.633	1.18781
H2O	C. tetragonoloba	8	94.3165	1
In11	C. tetragonoloba	8	115.971	1.22959
flg22	C. tetragonoloba	8	130.874	1.3876
H2O	H. podocarpum	6	52.6675	1
In11	H. podocarpum	6	20.2554	0.38459
flg22	H. podocarpum	6	126.45	2.40091
H2O	C. ternatea	5	11.0252	1
In11	C. ternatea	5	9.37294	0.850134
flg22	C. ternatea	5	12.84	1.1646
H2O	C. ternatea	6	7.72204	1
In11	C. ternatea	6	7.60054	0.984265
flg22	C. ternatea	6	5.9231	0.767038
H2O	P. tetragonolobus	5	12.4482	1
In11	P. tetragonolobus	5	14.5437	1.16834
flg22	P. tetragonolobus	5	16.7229	1.34341
H2O	G. max Williams	3	9.09976	1
In11	G. max Williams	3	5.73049	0.62974
flg22	G. max Williams	3	7.7759	0.854517
H2O	M. artropurpureum	4	29.497	1
In11	M. artropurpureum	4	135.19	4.58317
flg22	M. artropurpureum	4	83.273	2.8231
H2O	M. artropurpureum	5	169.932	1
In11	M. artropurpureum	5	267.214	1.57247
flg22	M. artropurpureum	5	169.707	0.998678
H2O	C. tetragonoloba	9	97.0004	1
In11	C. tetragonoloba	9	92.6927	0.95559
flg22	C. tetragonoloba	9	65.7356	0.677684
H2O	C. tetragonoloba	10	53.5399	1
In11	C. tetragonoloba	10	77.6369	1.45007
flg22	C. tetragonoloba	10	70.5973	1.31859
H2O	C. tetragonoloba	11	69.6614	1
In11	C. tetragonoloba	11	45.182	0.648596
flg22	C. tetragonoloba	11	64.8616	0.931098
H2O	C. tetragonoloba	12	52.997	1
In11	C. tetragonoloba	12	62.3463	1.17641
flg22	C. tetragonoloba	12	56.9117	1.07387
H2O	C. tetragonoloba	13	84.9138	1
In11	C. tetragonoloba	13	58.5185	0.689152
flg22	C. tetragonoloba	13	66.5826	0.78412
H2O	C. tetragonoloba	14	63.4356	1
In11	C. tetragonoloba	14	80.4917	1.26887
flg22	C. tetragonoloba	14	61.6301	0.971538
H2O	R. minima	7	18.9962	1
In11	R. minima	7	54.8653	2.88822
flg22	R. minima	7	15.9091	0.837487
H2O	R. minima	8	22.805	1
In11	R. minima	8	72.8286	3.19353
flg22	R. minima	8	46.0814	2.02066
H2O	P. erosus	8	8.73161	1
In11	P. erosus	8	8.9718	1.02751
flg22	P. erosus	8	9.83964	1.1269
H2O	H. podocarpum	7	50.9199	1
In11	H. podocarpum	7	84.448	1.65845
flg22	H. podocarpum	7	101.828	1.99977
H2O	H. podocarpum	8	81.2848	1
In11	H. podocarpum	8	111.943	1.37717
flg22	H. podocarpum	8	129.886	1.59791
H2O	H. podocarpum	9	62.0354	1
In11	H. podocarpum	9	61.4474	0.990521
flg22	H. podocarpum	9	106.095	1.71023
H2O	H. podocarpum	10	128.639	1
In11	H. podocarpum	10	141.11	1.09695
flg22	H. podocarpum	10	170.44	1.32495
H2O	V. unguiculata IT97	3	58.2418	1
In11	V. unguiculata IT97	3	454.148	7.79762
flg22	V. unguiculata IT97	3	59.9723	1.02971
H2O	V. unguiculata IT97	4	46.3792	1
In11	V. unguiculata IT97	4	502.926	10.8438
flg22	V. unguiculata IT97	4	62.0937	1.33882
H2O	H. podocarpum	11	13.1351	1
In11	H. podocarpum	11	3.46483	0.263783
flg22	H. podocarpum	11	21.0694	1.60405
H2O	L. purpureus	5	91.249	1
In11	L. purpureus	5	143.487	1.57248
flg22	L. purpureus	5	90.8631	0.995771
H2O	L. purpureus	6	62.9797	1
In11	L. purpureus	6	164.884	2.61805
flg22	L. purpureus	6	75.0241	1.19124
H2O	L. purpureus	7	68.2044	1
In11	L. purpureus	7	161.407	2.36653
flg22	L. purpureus	7	64.5978	0.947121
H2O	L. purpureus	8	66.01	1
In11	L. purpureus	8	182.799	2.76926
flg22	L. purpureus	8	81.5054	1.23474
H2O	L. purpureus	9	59.6457	1
In11	L. purpureus	9	166.627	2.79362
flg22	L. purpureus	9	45.4383	0.761803
H2O	R. minima	9	19.8819	1
In11	R. minima	9	124.264	6.2501
flg22	R. minima	9	50.2751	2.52869
H2O	R. minima	10	19.9703	1
In11	R. minima	10	69.6479	3.48758
flg22	R. minima	10	40.7155	2.0388
H2O	R. minima	11	72.8691	1
In11	R. minima	11	107.149	1.47043
flg22	R. minima	11	140.557	1.92889
H2O	R. minima	12	34.8832	1
In11	R. minima	12	105.441	3.0227
flg22	R. minima	12	59.6897	1.71113
H2O	R. minima	13	43.0167	1
In11	R. minima	13	78.5646	1.82638
flg22	R. minima	13	51.7168	1.20225
H2O	C. tetragonoloba	15	57.6693	1
In11	C. tetragonoloba	15	36.2122	0.627929
flg22	C. tetragonoloba	15	65.7813	1.14066
H2O	C. mucunoides	3	1.02294	1
In11	C. mucunoides	3	0.91981	0.899183
flg22	C. mucunoides	3	0.877224	0.857552
H2O	C. mucunoides	4	1.81255	1
In11	C. mucunoides	4	0.724384	0.39965
flg22	C. mucunoides	4	2.95521	1.63042
H2O	P. erosus	9	6.09588	1
In11	P. erosus	9	4.85877	0.797058
flg22	P. erosus	9	6.87376	1.12761
H2O	P. erosus	10	7.50962	1
In11	P. erosus	10	4.70378	0.626367
flg22	P. erosus	10	8.9524	1.19212
H2O	P. erosus	11	19.2879	1
In11	P. erosus	11	10.6205	0.550633
flg22	P. erosus	11	20.9724	1.08733
H2O	M. pruriens	8	21.105	1
In11	M. pruriens	8	41.7889	1.98005
flg22	M. pruriens	8	15.2303	0.721644
H2O	M. pruriens	9	53.7325	1
In11	M. pruriens	9	81.1064	1.50945
flg22	M. pruriens	9	52.7576	0.981856
H2O	M. pruriens	10	47.2631	1
In11	M. pruriens	10	61.2072	1.29503
flg22	M. pruriens	10	40.5015	0.856936
H2O	V. radiata	8	5.15873	1
In11	V. radiata	8	17.3688	3.36687
flg22	V. radiata	8	7.40741	1.4359
H2O	V. radiata	9	6.41626	1
In11	V. radiata	9	19.1405	2.98312
flg22	V. radiata	9	6.8357	1.06537
H2O	V. radiata	10	7.30018	1
In11	V. radiata	10	13.8524	1.89755
flg22	V. radiata	10	5.68147	0.778265
H2O	V. radiata	11	7.94607	1
In11	V. radiata	11	22.9001	2.88194
flg22	V. radiata	11	6.62305	0.833501
H2O	V. unguiculata IT97	5	28.2079	1
In11	V. unguiculata IT97	5	560.704	19.8775
flg22	V. unguiculata IT97	5	30.6611	1.08697
H2O	V. unguiculata IT97	6	35.4018	1
In11	V. unguiculata IT97	6	525.328	14.839
flg22	V. unguiculata IT97	6	47.6485	1.34594
H2O	V. unguiculata IT97	7	20.0909	1
In11	V. unguiculata IT97	7	334.997	16.6741
flg22	V. unguiculata IT97	7	29.7385	1.4802
H2O	V. unguiculata IT97	8	23.5245	1
In11	V. unguiculata IT97	8	374.873	15.9354
flg22	V. unguiculata IT97	8	28.1486	1.19657
H2O	V. unguiculata IT97	9	36.1028	1
In11	V. unguiculata IT97	9	440.916	12.2128
flg22	V. unguiculata IT97	9	43.2338	1.19752
H2O	V. unguiculata IT97	10	33.2668	1
In11	V. unguiculata IT97	10	620.885	18.6638
flg22	V. unguiculata IT97	10	46.4743	1.39702
H2O	V. unguiculata IT97	11	30.1874	1
In11	V. unguiculata IT97	11	649.916	21.5294
flg22	V. unguiculata IT97	11	36.4648	1.20795
H2O	P. erosus	12	21.6084	1
In11	P. erosus	12	22.5821	1.04506
flg22	P. erosus	12	34.2734	1.58612
H2O	C. cajan UCR1	9	27.4657	1
In11	C. cajan UCR1	9	37.3083	1.35836
flg22	C. cajan UCR1	9	33.6952	1.22681
H2O	C. cajan UCR1	10	73.7858	1
In11	C. cajan UCR1	10	109.273	1.48094
flg22	C. cajan UCR1	10	85.8312	1.16325
H2O	C. cajan UCR1	11	32.0329	1
In11	C. cajan UCR1	11	46.6107	1.45509
flg22	C. cajan UCR1	11	46.6251	1.45554
H2O	C. cajan UCR1	12	32.4564	1
In11	C. cajan UCR1	12	45.1463	1.39098
flg22	C. cajan UCR1	12	46.3437	1.42788
H2O	G. max Williams	4	6.17258	1
In11	G. max Williams	4	3.8825	0.628992
flg22	G. max Williams	4	3.85313	0.624234
H2O	G. max Williams	5	5.84837	1
In11	G. max Williams	5	3.0189	0.516195
flg22	G. max Williams	5	19.795	3.38471
H2O	G. max Williams	6	3.13332	1
In11	G. max Williams	6	4.0022	1.27731
flg22	G. max Williams	6	4.34366	1.38628
H2O	G. max Williams	7	3.05741	1
In11	G. max Williams	7	4.00012	1.30834
flg22	G. max Williams	7	8.89797	2.9103
H2O	G. max Williams	8	4.10187	1
In11	G. max Williams	8	3.35121	0.816994
flg22	G. max Williams	8	4.05973	0.989726
H2O	G. max Williams	9	3.51072	1
In11	G. max Williams	9	2.87572	0.819125
flg22	G. max Williams	9	6.72992	1.91696
H2O	G. max Williams	10	5.55199	1
In11	G. max Williams	10	5.1354	0.924965
flg22	G. max Williams	10	18.8483	3.39486
H2O	G. max Williams	11	6.38205	1
In11	G. max Williams	11	4.87506	0.763871
flg22	G. max Williams	11	10.6604	1.67037
H2O	M. lathyroides	6	58.0639	1
In11	M. lathyroides	6	206.306	3.5531
flg22	M. lathyroides	6	144.162	2.48281
H2O	M. lathyroides	7	93.4905	1
In11	M. lathyroides	7	202.351	2.1644
flg22	M. lathyroides	7	112.755	1.20606
H2O	M. lathyroides	8	121.245	1
In11	M. lathyroides	8	223.306	1.84178
flg22	M. lathyroides	8	134.509	1.1094
H2O	M. lathyroides	9	112.192	1
In11	M. lathyroides	9	208.025	1.85419
flg22	M. lathyroides	9	117.654	1.04868
H2O	M. lathyroides	10	111.464	1
In11	M. lathyroides	10	155.329	1.39353
flg22	M. lathyroides	10	176.699	1.58525
H2O	M. lathyroides	11	78.481	1
In11	M. lathyroides	11	139.268	1.77454
flg22	M. lathyroides	11	98.0242	1.24902
H2O	M. lathyroides	12	42.394	1
In11	M. lathyroides	12	271.388	6.40158
flg22	M. lathyroides	12	95.6964	2.25731
H2O	M. lathyroides	13	147.263	1
In11	M. lathyroides	13	290.406	1.97203
flg22	M. lathyroides	13	138.261	0.938874
H2O	M. lathyroides	14	91.7325	1
In11	M. lathyroides	14	229.815	2.50527
flg22	M. lathyroides	14	165.551	1.80471
H2O	M. lathyroides	15	57.4311	1
In11	M. lathyroides	15	159.237	2.77266
flg22	M. lathyroides	15	56.0035	0.975143
H2O	M. lathyroides	16	29.9422	1
In11	M. lathyroides	16	226.578	7.56718
flg22	M. lathyroides	16	62.5261	2.08823
H2O	G. max Williams	12	6.70758	1
In11	G. max Williams	12	5.05135	0.753081
flg22	G. max Williams	12	14.4775	2.15837
H2O	C. cajan UCR1	13	16.9028	1
In11	C. cajan UCR1	13	70.7954	4.18839
flg22	C. cajan UCR1	13	19.7193	1.16663
H2O	M. pruriens	11	6.81889	1
In11	M. pruriens	11	12.8546	1.88514
flg22	M. pruriens	11	5.50956	0.807984
H2O	P. tetragonolobus	6	16.7036	1
In11	P. tetragonolobus	6	14.8319	0.887946
flg22	P. tetragonolobus	6	31.6956	1.89753
H2O	P. tetragonolobus	7	10.3247	1
In11	P. tetragonolobus	7	4.42124	0.428219
flg22	P. tetragonolobus	7	44.3105	4.29169
H2O	P. tetragonolobus	8	9.63963	1
In11	P. tetragonolobus	8	5.04958	0.523835
flg22	P. tetragonolobus	8	43.9343	4.55767
H2O	P. tetragonolobus	9	15.1013	1
In11	P. tetragonolobus	9	13.116	0.868534
flg22	P. tetragonolobus	9	35.2505	2.33428
H2O	M. pruriens	12	7.62721	1
In11	M. pruriens	12	16.125	2.11414
flg22	M. pruriens	12	9.96309	1.30626
H2O	D. unicatum	8	8.28045	1
In11	D. unicatum	8	8.8941	1.07411
flg22	D. unicatum	8	21.8353	2.63697
H2O	D. unicatum	9	18.0783	1
In11	D. unicatum	9	21.4111	1.18435
flg22	D. unicatum	9	30.9071	1.70962
H2O	D. unicatum	10	13.0073	1
In11	D. unicatum	10	19.1701	1.47379
flg22	D. unicatum	10	23.8073	1.8303
H2O	D. unicatum	11	37.7096	1
In11	D. unicatum	11	46.5052	1.23324
flg22	D. unicatum	11	30.8457	0.817979
H2O	M. artropurpureum	6	79.8433	1
In11	M. artropurpureum	6	177.322	2.22088
flg22	M. artropurpureum	6	176.665	2.21265
H2O	M. artropurpureum	7	45.8018	1
In11	M. artropurpureum	7	136.795	2.98668
flg22	M. artropurpureum	7	58.1414	1.26941
H2O	T. labialis	6	8.83795	1
In11	T. labialis	6	21.6917	2.45438
flg22	T. labialis	6	14.0785	1.59296
H2O	T. labialis	7	5.12381	1
In11	T. labialis	7	14.6037	2.85016
flg22	T. labialis	7	6.48043	1.26477
H2O	T. labialis	8	17.046	1
In11	T. labialis	8	17.2278	1.01066
flg22	T. labialis	8	22.5259	1.32148
H2O	T. labialis	9	4.00466	1
In11	T. labialis	9	13.6635	3.41191
flg22	T. labialis	9	13.1277	3.27811
H2O	T. labialis	10	10.1944	1
In11	T. labialis	10	13.1186	1.28684
flg22	T. labialis	10	17.058	1.67327
H2O	T. labialis	11	8.07836	1
In11	T. labialis	11	12.8597	1.59187
flg22	T. labialis	11	16.6385	2.05964
H2O	M. artropurpureum	8	26.4092	1
In11	M. artropurpureum	8	81.4289	3.08336
flg22	M. artropurpureum	8	33.8571	1.28202
H2O	C. angustifolia	1	17.6253	1
In11	C. angustifolia	1	55.3174	3.13851
flg22	C. angustifolia	1	57.0548	3.23709
H2O	C. angustifolia	2	23.4367	1
In11	C. angustifolia	2	68.824	2.93659
flg22	C. angustifolia	2	65.4998	2.79475
H2O	C. angustifolia	3	26.3184	1
In11	C. angustifolia	3	78.8669	2.99665
flg22	C. angustifolia	3	72.7281	2.7634
H2O	C. angustifolia	4	15.3561	1
In11	C. angustifolia	4	55.9509	3.64356
flg22	C. angustifolia	4	38.2436	2.49045
H2O	C. angustifolia	5	13.7538	1
In11	C. angustifolia	5	61.7909	4.49264
flg22	C. angustifolia	5	64.5631	4.69419
H2O	C. angustifolia	6	23.4784	1
In11	C. angustifolia	6	76.9005	3.27537
flg22	C. angustifolia	6	74.8902	3.18974
H2O	C. angustifolia	7	9.34694	1
In11	C. angustifolia	7	26.8711	2.87485
flg22	C. angustifolia	7	21.0471	2.25177
H2O	C. angustifolia	8	8.48233	1
In11	C. angustifolia	8	16.8181	1.98272
flg22	C. angustifolia	8	24.3339	2.86878
H2O	C. angustifolia	9	9.83017	1
In11	C. angustifolia	9	7.95263	0.809002
flg22	C. angustifolia	9	14.4167	1.46658
H2O	C. angustifolia	10	10.7133	1
In11	C. angustifolia	10	16.478	1.53809
flg22	C. angustifolia	10	13.3669	1.24769
H2O	C. angustifolia	11	29.0583	1
In11	C. angustifolia	11	56.4652	1.94317
flg22	C. angustifolia	11	74.9608	2.57967
H2O	C. angustifolia	12	17.6286	1
In11	C. angustifolia	12	25.087	1.42308
flg22	C. angustifolia	12	34.4391	1.95359
H2O	H. podocarpum	12	24.8927	1
In11	H. podocarpum	12	38.455	1.54483
flg22	H. podocarpum	12	34.7514	1.39605
H2O	H. podocarpum	13	32.793	1
In11	H. podocarpum	13	50.9526	1.55377
flg22	H. podocarpum	13	49.6453	1.5139
