# Supplementary material for: Evolutionary gain and loss of a plant pattern-recognition receptor for HAMP recognition
Source: eLife. 2022 Nov 15;11:e81050. doi: 10.7554/eLife.81050 (PMC9718524; doi:10.7554/eLife.81050)
Supplement: Supplementary file 6. [file elife-81050-supp6.xlsx]

## Sheet: Supplementary file 6a
Supplementary file 6a: Overview of mined assemblies of contiguous INR loci (+ coordinates) and LRR-RLPs
Species	Coordinates INR-locus	Source	Version	Source	Publication
A. precatorius	scaffold7: 31969417 - 32016012	PRJNA510631	Abrus_2018	ncbi	Los Alamaos National laboratory
C. arietum	Ca4: 11870703-1189072	PRJNA175619	v2.0	legumeinfo	Varshney, R.K. et al. Draft genome sequence of chickpea (Cicer arietinum) provides a resource for trait improvement.", Nat Biotechnol, 2013 Mar;31(3):240-6
C. cajan	chr2: 29826725..29884952	PRJNA72815	Cc1.0	legumeinfo	Varshney, R. K. et al. Draft genome sequence of pigeonpea (Cajanus cajan), an orphan legume crop of resource-poor farmers. Nat. Biotechnol. 30, 83–89 (2012).
C. ensiformis	contig1008 1549076 - 1605091	PRJNA817235	/	ncbi	this article
C. tetragonoloba	scaffold 337: 6153216 - 6183212	PRJNA817237	/	ncbi	this article
G. max	chr10: 45903556 - 45967327	PRJNA19861	Wm82.a4.v1	phytozome	Schmutz, J. et al. Genome sequence of the palaeopolyploid soybean. Nature 463, 178–183 (2010).
G. soja	chr10: 47378544 - 47452470	PRJNA486704	W05	soybase	Xie, M. et al. A reference-grade wild soybean genome. Nat. Commun. 10, (2019).
H. podocarpum	contig2358: 3237651 - 3384000	PRJNA817236	/	ncbi	this article, PRJNA817236
L. angustifolius	NLL-04: 26913234 - 26928233	PRJNA299755	Okt 3 2019	orcae	Chang, Y. et al. The draft genomes of five agriculturally important African orphan crops. Gigascience (2018) doi:10.1093/gigascience/giy152.
L. purpureus	scaffold5646: 436000-470000	PRJNA474418	/	ncbi	this article
M. pruriens	contig_170: 43000-76069	PRJNA414658	ASM337056v1	ncbi	African Centre of excellence in Phytomedicine Research
M. lathyroides	not included in locus analysis	PRJNA820752	/	ncbi	this article
M. truncatula	Mt1: 44858000 - 44875999	PRJNA10791	/	ncbi	this article
P. acutifolius	chr7: 7688150 - 7649220	PRJNA607288	WLD v2.0	phytozome	Moghaddam, S. M., Oladzad, A., Koh, C., Ramsay, L., Hart, J. P., Mamidi, S., … McClean, P. E. (2021). The tepary bean genome provides insight into evolution and domestication under heat stress. Nature Communications, 12(1). https://doi.org/10.1038/s41467-021-22858-x
P. coccineus	not included in locus analysis	PRJNA448610	GCA_003122825.1	ncbi	Michigan State University
P. erosus	NODE_630: 12001-38879	PRJNA817234	/	ncbi	this article
P. lunatus	chr Pl07: 7391354 -7430853	PRJNA596114	V1	phytozome	PRJNA596114
P. vulgaris	chr7: 7235873 - 7261027	PRJNA41439	v2.1	phytozome	Schmutz, J. et al. A reference genome for common bean and genome-wide analysis of dual domestications. Nat. Genet. 46, 707–713 (2014).
T. pratense	scaffold292: 212000-232810	PRJEB9186	v3	legumeinfo	De Vega JJ et al., "Red clover (Trifolium pratense L.) draft genome provides a platform for trait improvement.", Sci Rep, 2015 Nov 30;5:17394
V. angularis	chr2: 28706681 - 28747816	PRJNA261643	v3.0	legumeinfo	Kang, Y. J. et al. Draft genome sequence of adzuki bean, Vigna angularis. Sci. Rep. 5, 1–8 (2015).
V. radiata	chr8: 40123604 - 40157782	PRJNA243847	Vr1.0	legumeinfo	Kang, Y. J. et al. Genome sequence of mungbean and insights into evolution within Vigna species. Nat. Commun. 5, 1–9 (2014).
V. unguiculata	chr7: 34221025 - 34258814	PRJNA381312	v1.1	legumeinfo	Lonardi, S. et al. The genome of cowpea ( Vigna unguiculata [L.] Walp.). Plant J. 98, 767–782 (2019).

## Sheet: Supplementary file 6b
Supplementary file 6b: Genome assembly statistics
Species	Assembly name	Nanopore_Read_size (Gb)	Total_length (bp)	Contigs (#)	longest contig(bp)	Gaps (#)	N50 length (bp)	N50 count (#)	BUSCO
Canavalia ensiformis	Censiformis.flye.racon3.pilon3.fasta	4.7	535475211	1059	7084218	2	1238787	122	C:97.6%[S:94.2%,D:3.4%],F:0.6%,M:1.8%,n:2326 (eudicots_odb10.2019-11-20)
Cyamopsis tetragonoloba	Ctetragonoloba.flye.racon3.pilon3.fasta	18.1	440793772	654	37304608	0	17903558	8	C:98.8%[S:96.5%,D:2.3%],F:0.4%,M:0.8%,n:2326 (eudicots_odb10.2019-11-20)
Hylodesmum podocarpum	Hpodocarpum.flye.racon3.pilon3.fasta	19.4	399086610	1560	15431257	0	6138455	21	C:99.1%[S:95.9%,D:3.2%],F:0.1%,M:0.8%,n:2326 (eudicots_odb10.2019-11-20)
Pachyrhizus erosus	Perosus.spades.fasta	0.4468	517598913	864219	136512	1597	9506	13885	C:94.1%[S:91.9%,D:2.2%],F:1.7%,M:4.2%,n:5366 (fabales_odb10.2019-11-20)

## Sheet: Supplementary file 6c
Supplementary file 6c: Output file of CENSOR analysis which detected repetitive elements of the INR loci by comparison to known repeats of the Arabidopsis thaliana Repbase database
Name	From	To	Length	within anchors?	Name	From	To	Class	Dir	Sim	Pos/Mm:Ts	Score
A. precatorius	12048	12297	249	yes	ATDNA2T9C	1129	1367	DNA/MuDR	d	0.7532	2.2353	252
A. precatorius	13128	13222	94	yes	HELITRONY1A	225	308	DNA/Helitron	c	0.7753	1.3	240
A. precatorius	24169	24233	64	yes	MuDR-N6_AT	619	687	DNA/MuDR	c	0.8438	2.6667	253
A. precatorius	24509	24640	131	yes	MuDR-N8_AT	155	292	DNA/MuDR	c	0.6992	1.6	200
A. precatorius	30893	31019	126	yes	Harbinger-N7_AT	199	320	DNA/Harbinger	d	0.712	1.9333	212
A. precatorius	33256	33396	140	yes	Harbinger-N7_AT	198	353	DNA/Harbinger	d	0.74	2.9	249
C. arietum	13752	13869	117	yes	AT9TSD1	1010	1124	DNA/MuDR	c	0.7712	1.875	243
C. arietum	14370	14437	67	yes	MuDR-N8_AT	398	468	DNA/MuDR	d	0.7429	1.4	206
C. cajan	9443	9491	48	yes	L1-2_AT	5703	5751	NonLTR/L1	c	0.8163	1.1667	237
C. cajan	14393	14546	153	yes	BRODYAGA1A	357	529	DNA/MuDR	c	0.7532	1.7857	212
C. cajan	14625	14748	123	yes	SIMPLEGUY1	741	853	DNA/Harbinger	d	0.7946	2	231
C. cajan	16597	16693	96	yes	Copia-39_AT-I	1509	1607	LTR/Copia	d	0.71	2	247
C. cajan	18244	18525	281	yes	ATCOPIA48B-I	3225	3506	LTR/Copia	d	0.7071	1.8286	599
C. cajan	18541	19319	778	yes	Copia-82_AT-I	3612	4380	LTR/Copia	d	0.6512	1.8991	507
C. cajan	21479	21537	58	yes	ATHPOGO	1893	1947	DNA/Mariner	c	0.8103	1.1667	205
C. cajan	24609	24819	210	yes	ATHPOGON1	154	371	DNA/Mariner	c	0.7415	3.0833	222
C. cajan	26373	26485	112	yes	ATENSAT1	700	806	Simple/Sat/SAT	d	0.7407	1.75	213
C. cajan	29835	30003	168	yes	HELITRONY1D	577	759	DNA/Helitron	d	0.7586	2.7	273
C. cajan	30185	30316	131	yes	ATCOPIA28_I	695	822	LTR/Copia	c	0.7578	1.8333	283
C. cajan	30535	30689	154	yes	BRODYAGA1A	344	515	DNA/MuDR	d	0.7485	2.6364	247
C. cajan	34395	34628	233	yes	BRODYAGA1A	355	580	DNA/MuDR	d	0.7679	3.4	302
C. cajan	39329	39366	37	yes	ATIS112A	5152	5188	DNA/Harbinger	c	0.8684	2	201
C. cajan	42493	42627	134	yes	MuDR-N6_AT	129	264	DNA/MuDR	d	0.7481	2.4	225
C. cajan	47593	47866	273	yes	HELITRONY3	215	493	DNA/Helitron	d	0.6981	2	243
C. cajan	48203	48406	203	yes	ARNOLDY1	388	586	DNA/MuDR	c	0.6939	1.2941	245
C. cajan	49614	49719	105	yes	MuDR-N21_AT	222	329	DNA/MuDR	c	0.6923	1.1154	384
C. cajan	49720	49803	83	yes	ATCOPIA24I	2735	2815	LTR/Copia	c	0.6988	1.1579	270
C. cajan	50390	50482	92	yes	TAG3N1	474	555	DNA/hAT	c	0.7647	2.4286	220
C. ensiformis	13683	13776	93	yes	ATENSPM2	2690	2792	DNA/EnSpm/CACTA	c	0.7917	1.8571	229
C. ensiformis	15870	15974	104	yes	AT9TSD1	548	640	DNA/MuDR	d	0.7551	3	216
C. ensiformis	23594	23677	83	yes	ATREP10D	127	214	DNA/Helitron	d	0.7586	1.5	227
C. ensiformis	24700	24745	45	yes	Copia-29_AT-I	2376	2421	LTR/Copia	d	0.7826	2	201
C. ensiformis	25291	25487	196	yes	hAT-N5_AT	90	297	DNA/hAT	c	0.7385	2.3333	212
C. ensiformis	26009	26091	82	yes	HELITRON4	17122	17199	DNA/Helitron	d	0.7895	1.3333	240
C. ensiformis	26166	26273	107	yes	HELITRONY1B	607	735	DNA/Helitron	d	0.7632	1.5	220
C. ensiformis	27094	27340	246	yes	BRODYAGA1A	342	574	DNA/MuDR	d	0.7414	3.3846	230
C. ensiformis	29631	29677	46	yes	MuDR-1_AT	5831	5877	DNA/MuDR	d	0.8723	99	318
C. ensiformis	32969	33108	139	yes	ATMU5	1633	1772	DNA/MuDR	c	0.6643	1.72	338
C. ensiformis	44997	45068	71	yes	Copia-27_AT-I	439	511	LTR/Copia	c	0.726	1.8	231
C. ensiformis	47672	47982	310	yes	ATHPOGON1	62	336	DNA/Mariner	d	0.7437	1.9565	274
G. max	18480	18602	122	yes	ATMUN1	198	324	DNA/MuDR	d	0.7705	3	209
G. max	18913	18975	62	yes	ATDNA2T9C	577	639	DNA/MuDR	d	0.8065	1.6	206
G. max	36582	36775	193	yes	BRODYAGA1A	489	670	DNA/MuDR	c	0.712	1.9091	200
G. max	37415	37646	231	yes	HELITRONY3	3555	3785	DNA/Helitron	d	0.7273	1.4667	358
G. max	52801	52860	59	yes	L1-2_AT	1409	1466	NonLTR/L1	d	0.7627	1.7143	219
G. max	55464	55707	243	yes	HELITRONY3	3535	3785	DNA/Helitron	d	0.7373	1.6667	399
G. soja	19221	19283	62	yes	ATDNA2T9C	577	639	DNA/MuDR	d	0.8065	1.6	206
G. soja	37225	37456	231	yes	HELITRONY3	3555	3785	DNA/Helitron	d	0.7273	1.4667	358
G. soja	57683	57781	98	yes	ATSAT5	683	766	Simple/Sat	d	0.8068	2.25	207
G. soja	62328	62387	59	yes	L1-2_AT	1409	1466	NonLTR/L1	d	0.7627	1.7143	219
G. soja	64991	65234	243	yes	HELITRONY3	3535	3785	DNA/Helitron	d	0.7373	1.6667	399
H. podocarpum	43869	43910	41	yes	Copia-27_AT-I	471	511	LTR/Copia	c	0.8571	1.25	241
H. podocarpum	52269	52447	178	yes	ATCOPIA78_I	1544	1726	LTR/Copia	d	0.7429	1.5833	490
H. podocarpum	52621	52679	58	yes	ATCOPIA32B_I	1839	1894	LTR/Copia	d	0.7895	2.2	268
H. podocarpum	52821	53008	187	yes	ATCOPIA78_I	2105	2295	LTR/Copia	d	0.6755	1.6452	266
H. podocarpum	53370	53410	40	yes	Copia-31_AT-I	2592	2632	LTR/Copia	d	0.8049	2	205
H. podocarpum	53500	54338	838	yes	Copia-22_AT-I	2716	3549	LTR/Copia	d	0.6734	2.1043	1649
H. podocarpum	54527	54827	300	yes	Copia-4_AT-I	3774	4076	LTR/Copia	d	0.6622	1.8542	526
H. podocarpum	62372	62413	41	yes	Copia-27_AT-I	471	511	LTR/Copia	c	0.8571	1.25	241
H. podocarpum	65616	65977	361	yes	Gypsy-30_AT-I	2908	3268	LTR/Gypsy	d	0.6401	1.9194	430
H. podocarpum	66895	67018	123	yes	ATGP1I	2305	2431	LTR/Gypsy	d	0.648	1.75	323
H. podocarpum	67019	67120	101	yes	Gypsy-30_AT-I	2171	2273	LTR/Gypsy	d	0.7087	1.5263	346
H. podocarpum	72187	72482	295	yes	ATCOPIA69C-I	3651	3946	LTR/Copia	c	0.6747	1.9744	400
H. podocarpum	72550	73396	846	yes	ATCOPIA37_I	2805	3656	LTR/Copia	c	0.6543	1.8955	916
H. podocarpum	73423	73578	155	yes	ATCOPIA76_I	2604	2748	LTR/Copia	c	0.7034	1.9444	281
H. podocarpum	75604	75875	271	yes	ATCOPIA76_I	1649	1923	LTR/Copia	c	0.6528	2.2308	412
H. podocarpum	75905	76026	121	yes	ATCOPIA35_I	1511	1631	LTR/Copia	c	0.6911	1.5238	332
H. podocarpum	89542	89643	101	yes	HELITRONY1D	1348	1458	DNA/Helitron	c	0.7573	1.3571	265
H. podocarpum	96440	96555	115	yes	ENDOVIR1_I	2539	2654	LTR/Copia	d	0.7207	1.9231	258
H. podocarpum	96638	98749	2111	yes	ATCOPIA43I	2931	5068	LTR/Copia	d	0.6737	1.9688	3271
H. podocarpum	103157	103198	41	yes	Copia-27_AT-I	471	511	LTR/Copia	c	0.8571	1.25	241
H. podocarpum	110557	110630	73	yes	ATCOPIA27_I	5525	5593	LTR/Copia	c	0.7917	2.4	305
H. podocarpum	111081	111202	121	yes	ATCOPIA26I	3647	3768	LTR/Copia	d	0.6935	1.8333	321
H. podocarpum	111370	111534	164	yes	ATCOPIA53_I	4241	4414	LTR/Copia	d	0.6667	2.2727	261
H. podocarpum	111611	111862	251	yes	Copia-14_AT-I	4337	4588	LTR/Copia	d	0.6853	1.6429	616
H. podocarpum	124723	124964	241	yes	ATCOPIA78_I	1691	1933	LTR/Copia	d	0.6708	1.8947	401
H. podocarpum	125560	126309	749	yes	Copia-47_AT-I	2383	3149	LTR/Copia	c	0.6694	1.8468	1490
H. podocarpum	128667	129103	436	yes	Copia-71_AT-I	2722	3158	LTR/Copia	d	0.6667	1.8088	772
H. podocarpum	129503	129611	108	yes	Copia-91_AT-I	3398	3506	LTR/Copia	d	0.7222	2	363
H. podocarpum	129947	130011	64	yes	Copia-78_AT-I	4397	4461	LTR/Copia	d	0.7385	1.5455	301
H. podocarpum	136224	136265	41	yes	Copia-27_AT-I	471	511	LTR/Copia	c	0.8571	1.25	241
L. purpureus	18886	19011	125	yes	BRODYAGA1A	594	703	DNA/MuDR	c	0.7544	1.8182	201
L. purpureus	19584	19751	167	yes	ATREP5	189	342	DNA/Helitron	d	0.7273	1.5789	219
L. purpureus	19778	19912	134	yes	ATHPOGON1	239	364	DNA/Mariner	c	0.7638	5.75	203
L. purpureus	27953	28008	55	yes	ATENSPM10	1096	1144	DNA/EnSpm/CACTA	c	0.8235	1.4	204
M. pruriens	14171	14251	80	yes	BRODYAGA1A	665	734	DNA/MuDR	d	0.8108	9	206
M. pruriens	28280	28476	196	yes	BRODYAGA2	289	496	DNA	d	0.715	1.9048	202
M. pruriens	32739	32780	41	yes	Copia-73_AT-I	4116	4157	LTR/Copia	d	0.8095	2	229
P. acutifolius	10140	10387	247	yes	META1_I	580	823	LTR/Copia	d	0.7137	1.9615	243
P. acutifolius	10506	10707	201	yes	ATDNA2T9C	1160	1324	DNA/MuDR	d	0.75	2.2857	204
P. acutifolius	14351	14400	49	yes	ATCOPIA20I	2527	2576	LTR/Copia	d	0.84	4	282
P. acutifolius	19281	19367	86	yes	ATLINE2	3069	3157	NonLTR/L1	d	0.7386	1.6667	319
P. acutifolius	19377	19474	97	yes	ATLINE2	3072	3165	NonLTR/L1	d	0.766	1.3077	357
P. acutifolius	20471	20529	58	yes	ATREP3	575	639	DNA/Helitron	d	0.8065	1.3333	214
P. acutifolius	27266	27311	45	yes	Copia-8_AT-I	2986	3030	LTR/Copia	c	0.8043	1.4	224
P. acutifolius	32864	32913	49	yes	L1-13_AT	1692	1743	NonLTR/L1	c	0.7451	1.2	218
P. erosus	13226	13343	117	yes	ATHPOGON1	252	378	DNA/Mariner	d	0.7647	3	200
P. lunatus	11230	11289	59	yes	ATREP1	99	159	DNA/Helitron	d	0.8	3.3333	201
P. lunatus	11340	11424	84	yes	ATREP11	470	546	DNA/Helitron	d	0.7778	1.625	230
P. lunatus	14720	14755	35	yes	Helitron-N4_AT	1783	1818	DNA/Helitron	d	0.8611	2.5	226
P. lunatus	18654	18767	113	yes	ATLINE2	3115	3225	NonLTR/L1	d	0.7232	1.5625	328
P. lunatus	18959	19039	80	yes	L1-80_AT	3393	3473	NonLTR/L1	d	0.7349	1.3077	297
P. lunatus	19085	19176	91	yes	ATDNA2T9C	1156	1245	DNA/MuDR	d	0.7391	1.2857	210
P. lunatus	22139	22265	126	yes	BRODYAGA1A	564	692	DNA/MuDR	d	0.7686	2	262
P. lunatus	23563	23595	32	yes	VANDAL3	9755	9784	DNA/MuDR	c	0.9677	99	239
P. lunatus	25045	25090	45	yes	Copia-8_AT-I	2986	3030	LTR/Copia	c	0.8043	1.4	224
P. lunatus	29115	29225	110	yes	EnSpm-6_AT	5776	5901	DNA/EnSpm/CACTA	d	0.7607	2.1111	207
P. vulgaris	12917	12987	70	yes	ATCOPIA40_LTR	153	215	LTR/Copia	c	0.7727	1.5	246
P. vulgaris	14503	14540	37	yes	L1-44_AT	968	1005	NonLTR/L1	d	0.8684	2.5	256
P. vulgaris	17021	17096	75	yes	Copia-60_AT-I	5589	5663	LTR/Copia	d	0.7013	1.4286	215
V. angularis	11074	11209	135	yes	BRODYAGA1A	463	598	DNA/MuDR	c	0.7687	2.75	238
V. angularis	17624	17781	157	yes	HELITRONY1D	604	765	DNA/Helitron	c	0.7195	2.1875	262
V. angularis	18466	18516	50	yes	MuDR-6_AT	7527	7576	DNA/MuDR	d	0.7451	1.3333	219
V. angularis	20001	20146	145	yes	ATGP2I	3138	3291	LTR/Gypsy	c	0.6913	1.6538	472
V. angularis	20255	20332	77	yes	ATCOPIA23_I	495	575	LTR/Copia	c	0.7625	1.625	261
V. angularis	22430	22483	53	yes	MuDR-N1_AT	1440	1493	DNA/MuDR	c	0.8	4.5	211
V. angularis	27963	28092	129	yes	MuDR-N6_AT	596	715	DNA/MuDR	c	0.7417	1.6	240
V. angularis	32648	32704	56	yes	Copia-93_AT-I	595	651	LTR/Copia	d	0.8103	2.3333	231
V. radiata	11185	11278	93	yes	BRODYAGA1A	355	437	DNA/MuDR	c	0.8276	3.5	223
V. radiata	11818	12001	183	yes	ATREP10B	1382	1576	DNA/Helitron	d	0.6963	2.0952	201
V. radiata	15098	15152	54	yes	ARNOLD1	6049	6102	DNA	c	0.8302	3.5	227
V. radiata	18133	18232	99	yes	BRODYAGA1A	471	561	DNA/MuDR	c	0.8085	1.8	207
V. radiata	20302	20445	143	yes	MuDR-N6_AT	336	487	DNA/MuDR	d	0.7273	2.9091	207
V. radiata	20472	20620	148	yes	BRODYAGA2	789	942	DNA	c	0.7417	2.0769	223
V. radiata	20859	20953	94	yes	MuDR-N6_AT	596	682	DNA/MuDR	c	0.7816	2	208
V. radiata	22514	22561	47	yes	MuDR-N19_AT	581	621	DNA/MuDR	c	0.8571	1.25	227
V. unguiculata	16422	16535	113	yes	ATHPOGON2	37	141	DNA/Mariner	d	0.7636	3	229
V. unguiculata	18098	18179	81	yes	SIMPLEHAT2	1	83	DNA/hAT	d	0.7179	1.4286	235
V. unguiculata	18664	18816	152	yes	HELITRONY1D	145	281	DNA/Helitron	c	0.7083	1.3043	207
V. unguiculata	19664	19786	122	yes	SIMPLEGUY1	746	863	DNA/Harbinger	c	0.7845	2.6667	215
V. unguiculata	20088	20192	104	yes	Harbinger-N7_AT	267	356	DNA/Harbinger	c	0.7895	1.625	239
V. unguiculata	22248	22372	124	yes	Helitron-N1_AT	1859	1968	DNA/Helitron	d	0.7544	1.5385	253
V. unguiculata	23194	23288	94	yes	Helitron-N1_AT	3262	3368	DNA/Helitron	d	0.7755	2.1429	206
V. unguiculata	23718	23803	85	yes	ATREP2A	479	562	DNA/Helitron	d	0.7765	2.3333	222
V. unguiculata	24665	24774	109	yes	Helitron-N9_AT	583	682	DNA/Helitron	d	0.7843	1.6667	258
V. unguiculata	25375	25463	88	yes	Helitron-N10_AT	590	679	DNA/Helitron	c	0.7816	1.8571	219
