# Supplementary material for: Evolutionary gain and loss of a plant pattern-recognition receptor for HAMP recognition
Source: eLife. 2022 Nov 15;11:e81050. doi: 10.7554/eLife.81050 (PMC9718524; doi:10.7554/eLife.81050)
Supplement: Supplementary file 8. — Differences or consensus (dashed marks) from ancestral sequence reconstruction (ASR) construct N3 are indicated for all other sequences. The five AA polymorphisms between N3 and N4 that are similar within all LRR-RLPs of the INR clade and different in LRR-RLPs of the INR-like 1 sister clade are highlighted in yellow. C1-domain starts at the N-terminus, C3-domain ends at the C-terminus, C1 and C3 domain are separated by the C2-domain which is highlighted in the frame. [file elife-81050-supp8.pdf]

Vangu INR  
Vradi08g18340 INR  
Vigun07g219600 INR  
Phvul 007G077500 INR  
Pcocc INR  
Phacu.WLD.007G080800 INR  
PI07G0000085400 INR  
Mlathy INR  
Lp005646g0031 INR  
C.cajan 07316 INR  
Mprur INR  
N4  
N3  
Vangu INR-like 1  
Vradi08g18340 INR-like 1  
Vigun07g219700 INR-like 1  
Pcocc INR-like 1  
Phacu.WLD.007G080700 INR-like  
PI07G0000085300 INR-like 1  
Mlathy INR-like 1  
Lp005646g0031 INR-like 1  
C.cajan 07317 INR-like 1  
C.cajan 07317 INR-like 2

Vangu INR  
Vradi08g18340 INR  
Vigun07g219600 INR  
Phvul 007G077500 INR  
Pcocc INR  
Phacu.WLD.007G080800 INR  
PI07G0000085400 INR  
Mlathy INR  
Lp005646g0031 INR  
C.cajan 07316 INR  
Mprur INR  
N4  
N3  
Vangu INR-like 1  
Vradi08g18340 INR-like 1  
Vigun07g219700 INR-like 1  
Pcocc INR-like 1  
Phacu.WLD.007G080700 INR-like  
PI07G0000085300 INR-like 1  
Mlathy INR-like 1  
Lp005646g0031 INR-like 1  
C.cajan 07317 INR-like 1  
C.cajan 07317 INR-like 2

Vangu INR  
Vradi08g18340 INR  
Vigun07g219600 INR  
Phvul 007G077500 INR  
Pcocc INR  
Phacu.WLD.007G080800 INR  
PI07G0000085400 INR  
Mlathy INR  
Lp005646g0031 INR  
C.cajan 07316 INR  
Mprur INR  
N4  
N3  
Vangu INR-like 1  
Vradi08g18340 INR-like 1  
Vigun07g219700 INR-like 1  
Pcocc INR-like 1  
Phacu.WLD.007G080700 INR-like  
PI07G0000085300 INR-like 1  
Mlathy INR-like 1  
Lp005646g0031 INR-like 1  
C.cajan 07317 INR-like 1  
C.cajan 07317 INR-like 2

Vangu INR  
Vradi08g18340 INR  
Vigun07g219600 INR  
Phvul 007G077500 INR  
Pcocc INR  
Phacu.WLD.007G080800 INR  
PI07G0000085400 INR  
Mlathy INR  
Lp005646g0031 INR  
C.cajan 07316 INR  
Mprur INR  
N4  
N3  
Vangu INR-like 1  
Vradi08g18340 INR-like 1  
Vigun07g219700 INR-like 1  
Pcocc INR-like 1  
Phacu.WLD.007G080700 INR-like  
PI07G0000085300 INR-like 1  
Mlathy INR-like 1  
Lp005646g0031 INR-like 1  
C.cajan 07317 INR-like 1  
C.cajan 07317 INR-like 2
