# Supplementary figures and images for: Evolutionary gain and loss of a plant pattern-recognition receptor for HAMP recognition
Source: eLife journal article supplement (doi:10.7554/elife.81050), 2022-10-28

Figure 3-figure supplement 1-source data

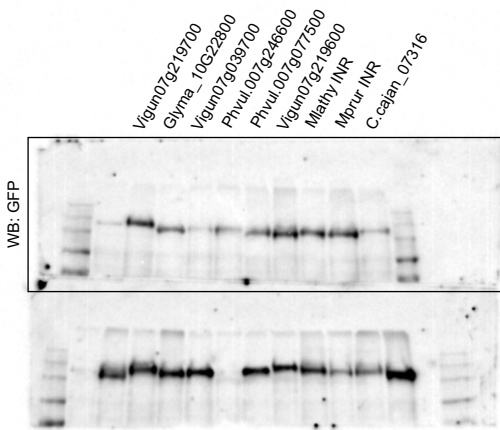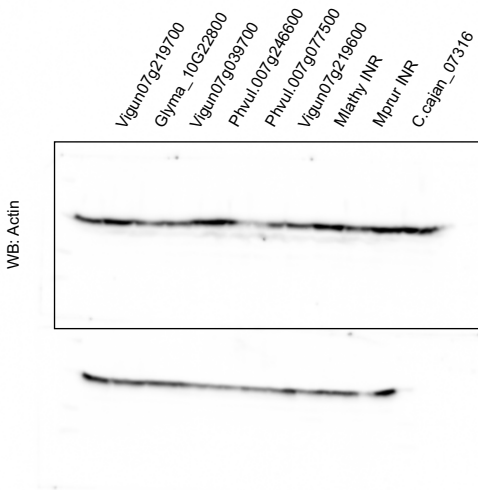

Supplement: fig3-figsupp1-data1 [file elife-81050-fig3-figsupp1-data1-v2.zip]

Figure 6-figure supplement 1-source data 1

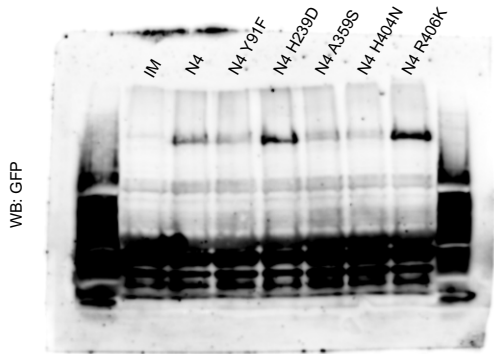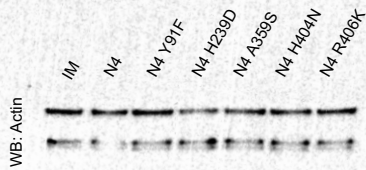

Supplement: fig6-figsupp1-data1 [file elife-81050-fig6-figsupp1-data1-v2.zip]

Figure 4-figure supplement 1-source data 1

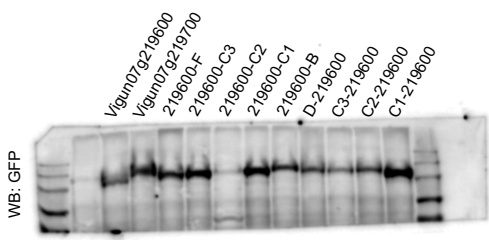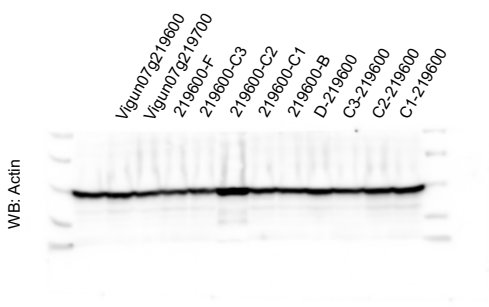

Supplement: supp [file Figure 4-figure supplement 1-source data 1.pdf › Figure 4-figure supplement 1-source data 1/Figure 4-figure supplement 1-source data 1.pdf]

Figure 5-figure supplement 2-source data 1

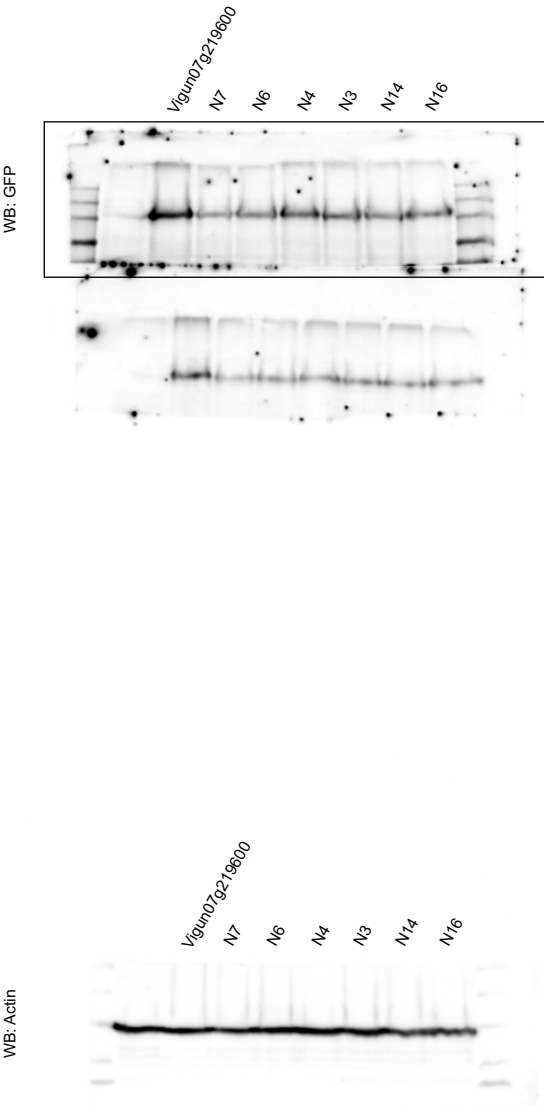

Supplement: supp [file Figure 5-figure supplement 2-source data 1.pdf › Figure 5-figure supplement 2-source data 1/Figure 5-figure supplement 2-source data 1.pdf]

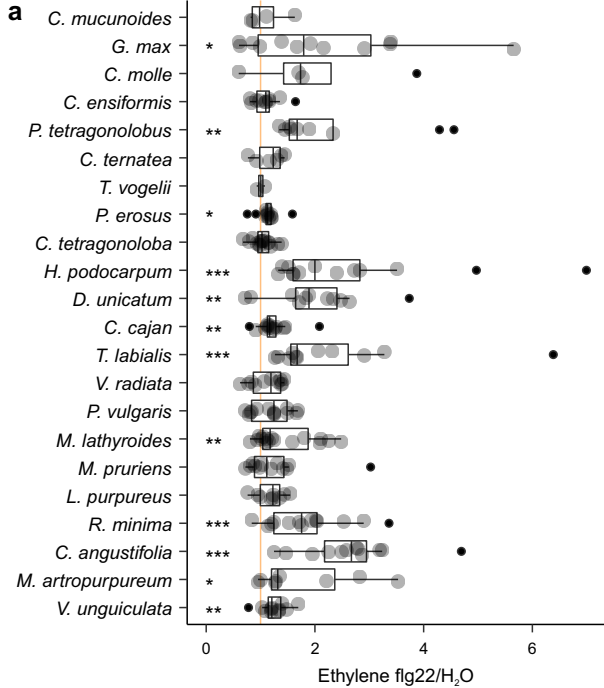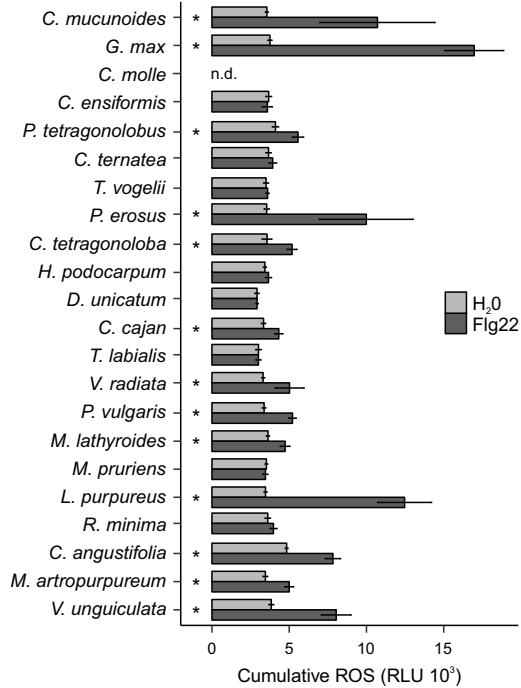

Supplement: supp [file elife_poa_e81050_Figure_1_figure_supplement_1.pdf › elife_poa_e81050_Figure_1_figure_supplement_1.pdf]

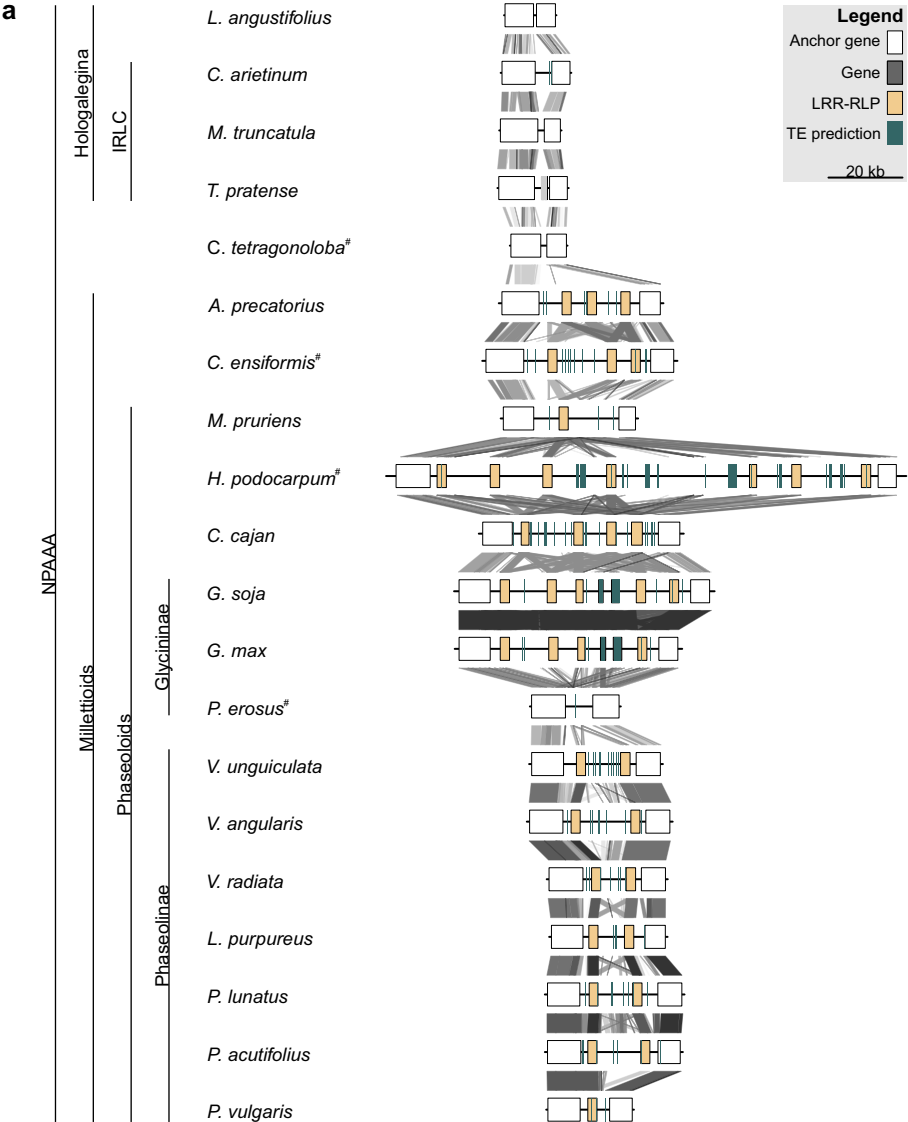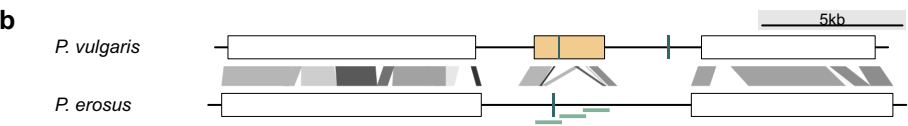

Supplement: supp [file elife_poa_e81050_Figure_2_figure_supplement_1.pdf › elife_poa_e81050_Figure_2_figure_supplement_1.pdf]

WB: GFP

245 —  
180 —  
135 —

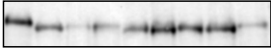

WB: Actin

48 —  
35 —

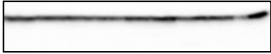

Supplement: supp [file elife_poa_e81050_Figure_3_figure_supplement_1.pdf › elife_poa_e81050_Figure_3_figure_supplement_1.pdf]

Phvul.007g077500

Phvul.007g077500 without tag

Vigun07g219600

Vigun07g219600 without tag

**a**

H<sub>2</sub>O    In11

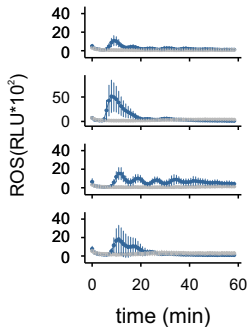

**b**

H<sub>2</sub>O    In11

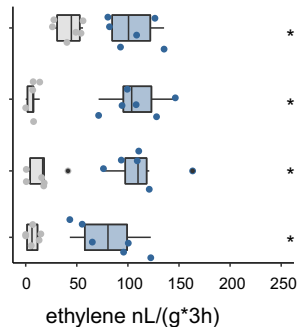

Supplement: supp [file elife_poa_e81050_Figure_3_figure_supplement_2.pdf › elife_poa_e81050_Figure_3_figure_supplement_2.pdf]

WB: Actin

48 —  
35 —

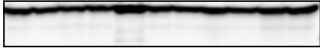

WB: GFP

245 —  
180 —  
135 —

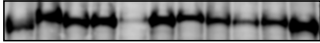

*Vigun079219600*  
*Vigun079219700*  
219600-F  
219600-C3  
219600-C2  
219600-C1  
D-219600-B  
C3-219600  
C2-219600  
C1-219600

Supplement: supp [file elife_poa_e81050_Figure_4_figure_supplement_1.pdf › elife_poa_e81050_Figure_4_figure_supplement_1.pdf]

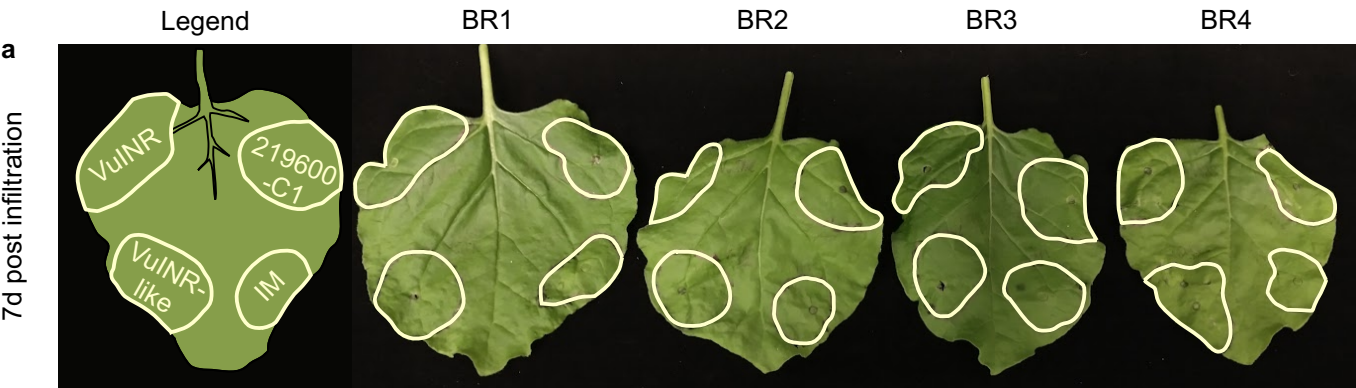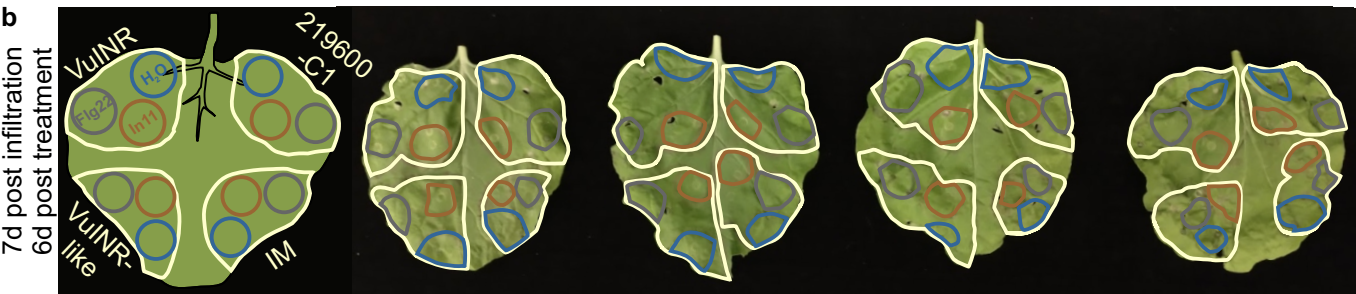

Supplement: supp [file elife_poa_e81050_Figure_4_figure_supplement_2.pdf › elife_poa_e81050_Figure_4_figure_supplement_2.pdf]

WB: Actin

48 —  
35 —

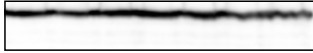

WB: GFP

245 —  
180 —  
135 —

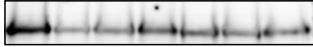

*Vigun07g219600*

N7

N6

N4

N3

N14

N16

Supplement: supp [file elife_poa_e81050_Figure_5_figure_supplement_2.pdf › elife_poa_e81050_Figure_5_figure_supplement_2.pdf]

WB: Actin

WB: GFP

*IM*      *N4*      *N4 Y91F*      *N4 H239D*      *N4 A359S*      *N4 H404N*      *N4 R406K*

245 —  
180 —  
135 —

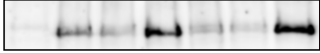

48 —  
35 —

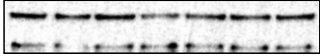

Supplement: supp [file elife_poa_e81050_Figure_6_figure_supplement_1.pdf › elife_poa_e81050_Figure_6_figure_supplement_1.pdf]
